# 1 **Liver sinusoidal endothelial cells constitute a major route for hemoglobin** 2 **clearance**

3 Gabriela Zurawska<sup>1\*</sup>, Zuzanna Sas<sup>2\*</sup>, Aneta Jończy<sup>1</sup>, Patryk Slusarczyk<sup>1</sup>, Raghunandan  
4 Mahadeva<sup>1</sup>, Marta Chwałek<sup>1</sup>, Maria Kulecka<sup>3</sup>, Izabela Rumieńczyk<sup>3</sup>, Morgane Moulin<sup>4</sup>, Kamil  
5 Jastrzębski<sup>1</sup>, Michał Mikula<sup>3</sup>, Anders Etzerodt<sup>4</sup>, Marta Miączyńska<sup>1</sup>, Tomasz P. Rygiel<sup>2,5,#,\$</sup> and  
6 Katarzyna Mleczko-Sanecka<sup>1,#,\$</sup>

7  
8 <sup>1</sup> International Institute of Molecular and Cell Biology in Warsaw, Warsaw, Poland

9 <sup>2</sup> Medical University of Warsaw, Warsaw, Poland

10 <sup>3</sup> Maria Skłodowska-Curie National Research Institute of Oncology, Warsaw, Poland

11 <sup>4</sup> Department of Biomedicine, Aarhus University, Aarhus, Denmark

12 <sup>5</sup> Mossakowski Medical Research Institute, Polish Academy of Sciences, Warsaw, Poland

13

14 \*# equal contribution

15 \$ To whom correspondence may be addressed: Katarzyna Mleczko-Sanecka, International  
16 Institute of Molecular and Cell Biology in Warsaw, 4 Ks. Trojdena Street, 02-109 Warsaw,  
17 Poland, E-mail: [kmsanecka@iimcb.gov.pl](mailto:kmsanecka@iimcb.gov.pl)

18 or

19 Tomasz P. Rygiel, Mossakowski Medical Research Institute, Polish Academy of Sciences,  
20 Warsaw, Poland, E-mail: [t.rygiel@imdik.pan.pl](mailto:t.rygiel@imdik.pan.pl)

21

## 22 **Key points:**

- 23 - LSECs engage macropinocytosis to efficiently scavenge free hemoglobin
- 24 - LSEC-mediated hemoglobin clearance participates in iron recycling from spleen-  
25 derived hemoglobin and contributes to its detoxification during hemolysis

26

27

28

29

30

31

32

33

34 **Abstract**

35

36 Mild hemolysis of senescent erythrocytes occurs physiologically in the spleen, resulting in  
37 hemoglobin (Hb) release, whereas pathologic erythrocyte rupture characterizes several  
38 diseases. Iron recycling from Hb and Hb detoxification have been attributed to the sequestration  
39 of Hb-haptoglobin complexes by macrophages. However, we found the existence of additional  
40 efficient Hb clearance routes in mice. We identified liver sinusoidal endothelial cells (LSECs)  
41 as the primary cells responsible for Hb sequestration, a process that involves macropinocytosis  
42 and operates independently of the Hb-haptoglobin receptor CD163. LSECs expressed heme  
43 oxygenase 1 and hepcidin-controlled ferroportin and were the most efficient cellular scavengers  
44 of Hb at doses below and above the haptoglobin binding capacity. Erythrocyte transfusion  
45 assays further demonstrated that while splenic red pulp macrophages are adept at  
46 erythrophagocytosis, liver Kupffer cells and LSECs mainly clear erythrocyte ghosts and Hb,  
47 respectively, transported from the spleen via the portal circulation. High-dose Hb injections in  
48 mice resulted in transient hepatic iron retention and early activation of the gene encoding heme  
49 oxygenase 1 (*Hmox1*) in LSECs. This response was associated with the transcriptional  
50 induction of the iron-sensing angiokine *Bmp6*, culminating in hepcidin-mediated transient  
51 serum hypoferremia. Injection of Hb and iron citrate elicited distinct transcriptional signatures  
52 in LSECs, and the *Bmp6* induction was phenocopied by erythrocyte lysis upon  
53 phenylhydrazine. Collectively, we propose that LSECs provide a key mechanism for Hb  
54 clearance, a function that establishes the spleen-liver axis for physiological iron recycling from  
55 Hb and contributes to heme detoxification during hemolysis, coupled with the induction of the  
56 BMP6-hepcidin axis, ultimately restoring iron homeostasis.

57

58

59

60

61

62

63

64

## 65 **Introduction**

66 Internal iron recycling from senescent red blood cells (RBCs) satisfies most of the body's iron  
67 needs<sup>1,2</sup> and relies chiefly on phagocytic clearance of aged RBCs by the splenic red pulp  
68 macrophages (RPMs).<sup>3,4</sup> However, recent evidence suggests that some aged RBCs escape  
69 erythrophagocytosis and lyse locally in the spleen, thus releasing hemoglobin (Hb).<sup>5</sup> Several  
70 inherited and acquired disorders, including hereditary anemias, autoimmune hemolytic  
71 diseases, or infections, are characterized by compromised erythrocyte stability and increased  
72 risk of hemolysis.<sup>6,7</sup> Free Hb is captured by the acute phase plasma protein haptoglobin.<sup>8</sup> The  
73 Hb-haptoglobin complexes are sequestered via CD163,<sup>9</sup> a receptor that is highly expressed by  
74 both splenic RPMs and liver macrophages, Kupffer cells (KCs).<sup>1,5</sup> However, the role of these  
75 macrophage populations in Hb uptake has not been well characterized. Interestingly,  
76 pharmacokinetic studies in non-rodent mammals have shown that the clearance rate of the Hb-  
77 haptoglobin complex is significantly slower than that of free Hb,<sup>10</sup> and that Hb sequestration  
78 may occur independently of haptoglobin and/or CD163.<sup>11,12</sup> These observations are clinically  
79 relevant as enhanced erythrophagocytosis and prolonged erythrolytic conditions lead to the  
80 partial loss of the CD163-expressing iron-recycling macrophages<sup>3,13</sup> and are characterized by  
81 depletion of the plasma haptoglobin pool.<sup>7,14,15</sup> Collectively, this evidence suggests that  
82 macrophages may be dispensable for Hb clearance. It is well established that free Hb undergoes  
83 renal glomerular filtration.<sup>16,17</sup> However, it remains unclear whether other specialized routes of  
84 extra-renal and macrophage-independent Hb clearance operate in the body.

85 The liver receives approximately 25% of the cardiac output and is exposed to the blood from  
86 the portal circulation, which drains the gastrointestinal tract and the spleen.<sup>18</sup> The hepatic  
87 capillary network, composed of venous sinusoids, is specialized in monitoring and filtering the  
88 blood components. Liver sinusoidal endothelial cells (LSECs), along with KCs, confer the most  
89 efficient dual scavenging system in the body.<sup>19</sup> While KCs engulf large particles, LSECs  
90 remove macromolecules and nanoparticles, a function that protects the body from waste by-  
91 products and noxious blood factors.<sup>20,21</sup> The maintenance of appropriate iron homeostasis adds  
92 to the growing spectrum of homeostatic functions of LSECs. Importantly, LSECs are the  
93 sensors of body iron levels and the major producers of the inducible angiokine bone  
94 morphogenetic protein 6 (BMP6), and the homeostatic BMP2.<sup>22,23</sup> BMPs function as upstream  
95 activators of hepcidin, a key iron-regulatory hormone produced by liver hepatocytes. Hepcidin  
96 suppresses iron release into the bloodstream via the sole known iron exporter ferroportin (FPN),  
97 thereby limiting iron availability under iron-rich conditions.<sup>24</sup> However, it remains unclear how

98 different types of iron signals are sensed and detoxified in the liver microenvironment, and  
99 whether the emerging scavenging functions of LSECs cross-talk with their role in maintaining  
100 iron homeostasis. Here, we show that LSECs constitute a major route for Hb clearance. They  
101 contribute to steady-state iron recycling from spleen-derived Hb that enters the liver via the  
102 portal vein and participate in heme detoxification during hemolysis, timely coupled with the  
103 induction of the iron-sensing BMP6-hepcidin axis.

## 104 **Results**

### 105 **LSECs engage macropinocytosis to sequester Hb**

106 Studies using radiolabeled Hb showed that the clearance of injected hemoglobin is rapid<sup>16</sup> and  
107 mainly mediated by the liver, kidney, and spleen.<sup>16,17</sup> To address the involvement of  
108 macrophages in Hb uptake we first performed experiments using clodronate liposomes, a well-  
109 established strategy that depletes tissue macrophages, including hepatic KCs. Using a whole-  
110 organ imaging system, we observed that regardless of the KCs' presence, the liver emerged as  
111 the major organ sequestering fluorescently-labeled mouse Hb (Fig. 1A and S1). Using flow  
112 cytometry and confocal microscopy imaging, we next identified LSECs as the major hepatic  
113 cell type that takes up Hb, surpassing KCs, hepatocytes, and monocytes (Fig. 1B and C, see  
114 Data Supplements for gating strategies). To better understand the mechanism of Hb uptake we  
115 used primary cell cultures of NPCs, which fully recapitulated a higher capacity of LSECs than  
116 KCs in Hb uptake, as validated by confocal microscopy and flow cytometry (Fig. 1D and Fig.  
117 S2A). Interestingly, in contrast to KCs, LSECs were negative for the Hb-haptoglobin complex  
118 receptor, CD163 (Fig. 1E), and free Hb was taken up more robustly than the haptoglobin-bound  
119 Hb (Fig. 1F). We, therefore, hypothesized that LSECs may sequester Hb in a receptor-  
120 independent manner, possibly via macropinocytosis, a non-specific internalization of  
121 extracellular fluid.<sup>26</sup> Staining of primary LSECs with an early endosome marker, EEA1,  
122 identified many constitutively formed intracellular vesicles of macropinosome size (1-2  $\mu\text{m}$ )  
123 (Fig. 1G and S2B). Fluorescently-labeled Hb was predominantly, though not exclusively,  
124 entrapped within such vesicles (Fig. 1G and S2B), and co-localized with high-molecular-weight  
125 dextran, a known macropinocytic cargo (Fig. 1H and S2C).<sup>27,28</sup> Consistently, a well-established  
126 blocker of macropinocytosis, ethylisopropyl amiloride (EIPA), in contrast to an inhibitor of  
127 clathrin-mediated endocytosis, chlorpromazine (CPZ), abolished Hb uptake (Fig. 1I and S2D).  
128 Likewise, Hb internalization was partially dependent on actin remodeling and Cdc42 activity,  
129 both important for macropinosome formation,<sup>27</sup> and canonical Wnt signaling via  $\beta$ -catenin, a  
130 pathway that is active in LSECs<sup>29</sup> and has previously been shown to activate macropinocytosis

131 (Fig. 1I).<sup>30,31</sup> Confirming the high macropinocytic capacity of LSECs *in vivo*, we demonstrated  
132 their ability for efficient uptake of fluorescently-labeled albumin, another known  
133 macropinocytic cargo (Fig. 1J).<sup>28</sup> Taken together, our data identify LSECs as efficient  
134 scavengers of both free and haptoglobin-bound Hb and implicate macropinocytosis as the  
135 pathway for Hb uptake.

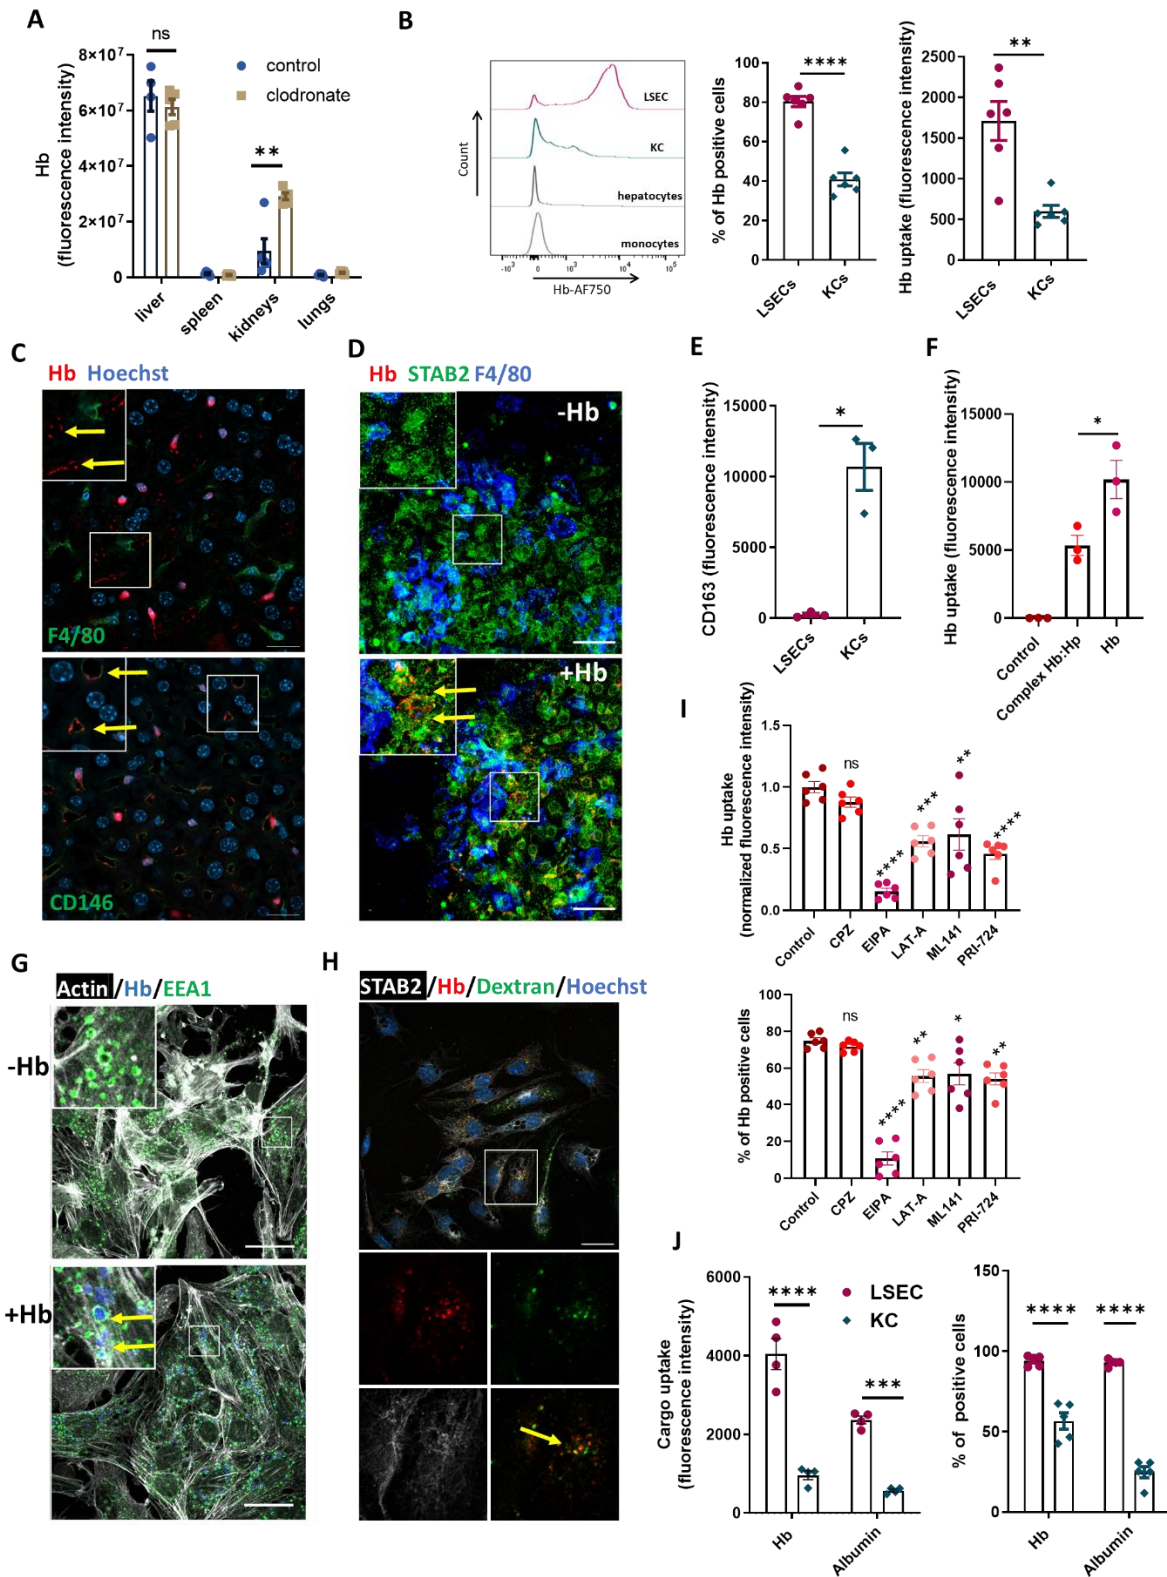

136

137 **Figure 1. LSECs engage macropinocytosis to sequester Hb.**

138 Hemoglobin (Hb) distribution in control and macrophage-depleted mice (clodronate) injected with  
 139 Alexa Fluor 750-labeled Hb (Hb-AF750, 10  $\mu$ g/mouse), imaged with Bruker *in vivo* Imaging System.  
 140 Results are presented as total fluorescent counts from the region of interest. (B) AF750 fluorescence  
 141 from particular liver cell populations isolated from Hb-AF750-injected mice was analyzed with flow  
 142 cytometry. (C) Frozen liver slices from mice injected with Hb-AF647 (red) were processed and stained



143 for Kupffer cells (KCs) (F4/80, green) or LSECs (CD146, green) and nuclei (blue). Arrows indicate Hb  
144 presence in the LSEC. (D) Hb-AF750 uptake *in vitro* was imaged in liver nonparenchymal cells (NPCs)  
145 treated with Hb-AF750 (0.5 µg/ml) and stained for F4/80 (blue) and the LSEC marker STAB2 (green).  
146 Arrows indicate Hb-AF750 (red) presence in the LSEC. (C, D) - areas in the highlighted rectangles are  
147 shown at higher magnification (left upper corner), scale bars, 20 µm. (E) Cell-surface expression of the  
148 CD163 receptor on LSECs and KCs was measured by flow cytometry and presented as fluorescence  
149 intensity. (F) Uptake of Hb in the presence of haptoglobin, Hp [(Hb-AF750:Hp, 0.5 µg : 16 µg) /ml] in  
150 NPCs *in vitro* cultures was measured with flow cytometry. (G) Hb-AF647 vesicle localization was  
151 imaged with microscopy in NPCs *in vitro* cultures depleted from macrophages. Arrows indicate Hb-  
152 AF647 (blue) presence in the EEA-1<sup>+</sup> (green) and Actin<sup>+</sup> (white) vesicles. Areas in the highlighted  
153 rectangles are shown at higher magnification (left corner). Scale bars, 20 µm. (H) Co-localization of Hb-  
154 AF647 (red) with rhodamine-dextran (green) was imaged with microscopy in STAB2<sup>+</sup> LSECs (white).  
155 Arrow indicates colocalization of Hb and rhodamine-dextran. The area in the highlighted rectangle is  
156 shown at higher magnification in separate channels below. Scale bar, 20 µm. (I) NPCs were pre-treated  
157 with the clathrin-mediated endocytosis inhibitor chlorpromazine (CPZ), the macropinocytosis blocker  
158 EIPA, actin polymerization blocker latrunculin A (LAT-A), inhibitor of Cdc42 GTPase ML141, or with  
159 β-catenin inhibitor PRI-724 before Hb-AF750 treatment for 10 min. Flow cytometry was used to  
160 determine Hb uptake by the LSECs. (J) Mice were injected for 1 h with Hb-AF750 or albumin-AF750,  
161 both at 10 µg/mouse. The fluorescence intensity of AF750, the percentage of AF750<sup>+</sup> LSECs, and KCs  
162 populations were measured with flow cytometry. Microscopic images were acquired using confocal  
163 microscopes LSM 800 or LSM710 (Zeiss) equipped with an EC Plan-Neofluar 40x/1.30 or 63x/1.4 Oil  
164 DIC M27 oil objectives and T-PMT detectors and acquisition software ZEN 2.6/ZEN2009. The images  
165 were processed using ImageJ or Adobe Photoshop with linear gamma adjustments of contrast and  
166 brightness. Numerical data are expressed as mean ± SEM, each data point represents one biological  
167 replicate. Welch's unpaired t-test was used to determine statistical significance in B and E, one-way  
168 ANOVA with Tukey's Multiple Comparison tests was used in A, F, and J; while two-way ANOVA with  
169 Tukey's Multiple Comparison tests was used in I; ns - not significant, \*p<0.05, \*\*p<0.01, \*\*\*p<0.001  
170 and \*\*\*\*p<0.0001

## 171 **LSECs outperform other endothelial and macrophage populations in Hb uptake**

172 Similar to the liver, sinusoidal endothelial cells are also present in the spleen and bone  
173 marrow,<sup>20</sup> organs that perform critical functions in systemic iron metabolism due to the  
174 presence of CD163<sup>+</sup> iron-recycling RPMs and erythroblastic island macrophages, respectively.  
175 Therefore, we sought to accurately compare the Hb-scavenging capacity of endothelial and  
176 macrophage populations from the spleen and bone marrow with that of hepatic LSECs and KCs  
177 over a wide range of Hb doses. We used 1 µg of Hb, an amount below the binding capacity of  
178 circulating haptoglobin (10-20 µg/ml plasma), an intermediate dose of 10 µg, and 100 µg  
179 (injected together with 10 mg of unlabeled Hb), which saturates the haptoglobin pool and  
180 mimics hemolytic conditions. We also injected mice with 1 µg of Hb bound to haptoglobin.  
181 Myeloid cells or ECs of the bone marrow were not capable of efficient Hb sequestration (Fig.  
182 S3A). Strikingly, we observed the extraordinary ability of LSECs to internalize Hb as compared  
183 to the other cell types analyzed as exemplified by 70-99% of Hb-positive cells depending on

184 the dose (Fig. 2A) and the highest intensity of the Hb signal per cell as compared to KCs, splenic  
185 ECs, or RPMs (Fig. 2B, D, F, H). The scavenging capacity of KCs and splenic ECs was  
186 gradually increased with the Hb dose, (Fig. 2C-F), whereas RPMs contributed, albeit slightly,  
187 to the Hb clearance only at the highest dose, mimicking hemolysis (Fig. 2G and H). Finally,  
188 using whole organ imaging and flow cytometry, we did not detect Hb accumulation in the aorta,  
189 lined by non-sinusoidal ECs (Fig. S3B and C). In conclusion, our data suggest that LSECs  
190 outperform other cell types in Hb clearance over a wide range of circulating Hb concentrations.



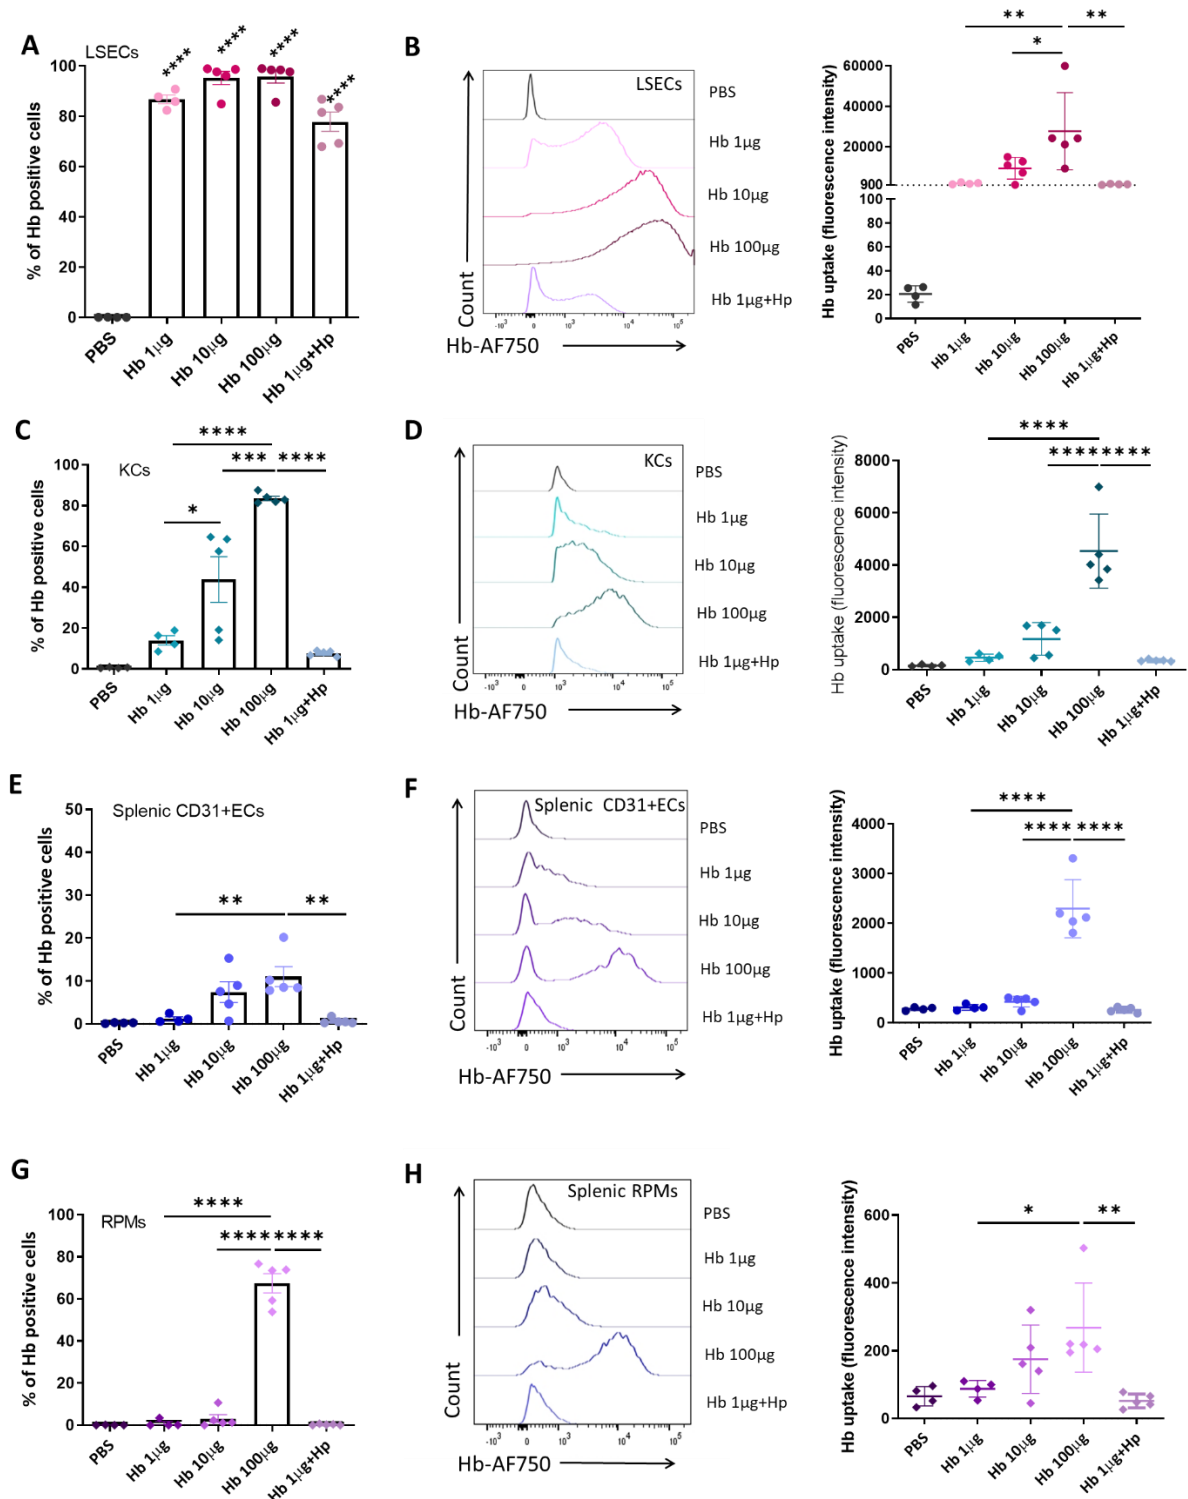

191

192 **Figure 2. LSECs outperform other endothelial populations and macrophages in Hb uptake.**

193 Percentage of Hb-AF750 uptake by (A) LSECs, (C) KCs, (E) splenic endothelial cells (ECs), and (G)  
 194 RPMs. Fluorescence intensity of Hb-AF750 in (B) LSECs, (D) KCs, (F) splenic endothelial cells, and  
 195 (H) RPMs. Both parameters were analyzed with flow cytometry. Data are expressed as mean ± SEM  
 196 and each data point represents one biological replicate. One-way ANOVA with Tukey's Multiple  
 197 Comparison tests was used to determine statistical significance; ns - not significant, \*p<0.05, \*\*p<0.01,  
 198 \*\*\*p<0.001 and \*\*\*\*p<0.0001

199 **LSECs constitutively express proteins critical for iron recycling from heme**

200 We were intrigued by the fact that LSECs efficiently scavenge low doses of Hb. To further  
201 explore their specialization, we examined data from single-cell RNA sequencing of ECs from  
202 different mouse organs.<sup>32</sup> Interestingly, both *Hmox1* [encoding heme oxygenase 1 (HO-1)] and  
203 *Blrvb* (encoding biliverdin reductase b, BLRVB), genes important for heme catabolism, were  
204 identified as metabolic markers exclusively specific for liver EC. Using EC Atlas, we visualized  
205 the expression levels of *Hmox1* and *Blrvb*, as well as of *Slc40a1*, the gene encoding the iron  
206 exporter FPN. We found a clear signature for the high expression of these transcripts in liver  
207 ECs as compared to other organs (Fig. S4). Consistently, we detected their clear expression at  
208 the protein level in primary LSECs (Fig. 3A and B). Flow cytometric quantification revealed a  
209 significantly higher FPN expression in LSECs than in splenic and bone marrow ECs,  
210 comparable to iron-recycling KCs and RPMs, whereas HO-1 levels were intermediate between  
211 macrophages and ECs from other organs (Fig. 3C). Likewise, LSECs showed significantly  
212 higher levels of labile iron than ECs from the spleen and bone marrow (Fig. 3D). High labile  
213 iron levels in LSECs may explain why liver ECs were specifically hallmarked by high  
214 expression levels of genes essential for protection against free radicals, such as *Gpx4*, *Gclc*, and  
215 *Me2*, according to single-cell RNA sequencing.<sup>32</sup> FPN was robustly induced in LSECs under  
216 conditions of systemic iron deficiency caused by iron-restricted feeding (Fig. 3E), a response  
217 that mimicked that of KCs (Fig. 3F) and suggested a tight control of LSECs' FPN by circulating  
218 hepcidin. Confirming the iron-exporting function of LSEC FPN, we detected a significant  
219 increase in labile iron in LSECs in response to mini-hepcidin PR73 injection (Fig. 3G).<sup>33</sup>  
220 Collectively, these data indicate that LSECs are equipped with a protein machinery that drives  
221 iron recycling from heme, suggesting their role in a steady-state iron turnover.

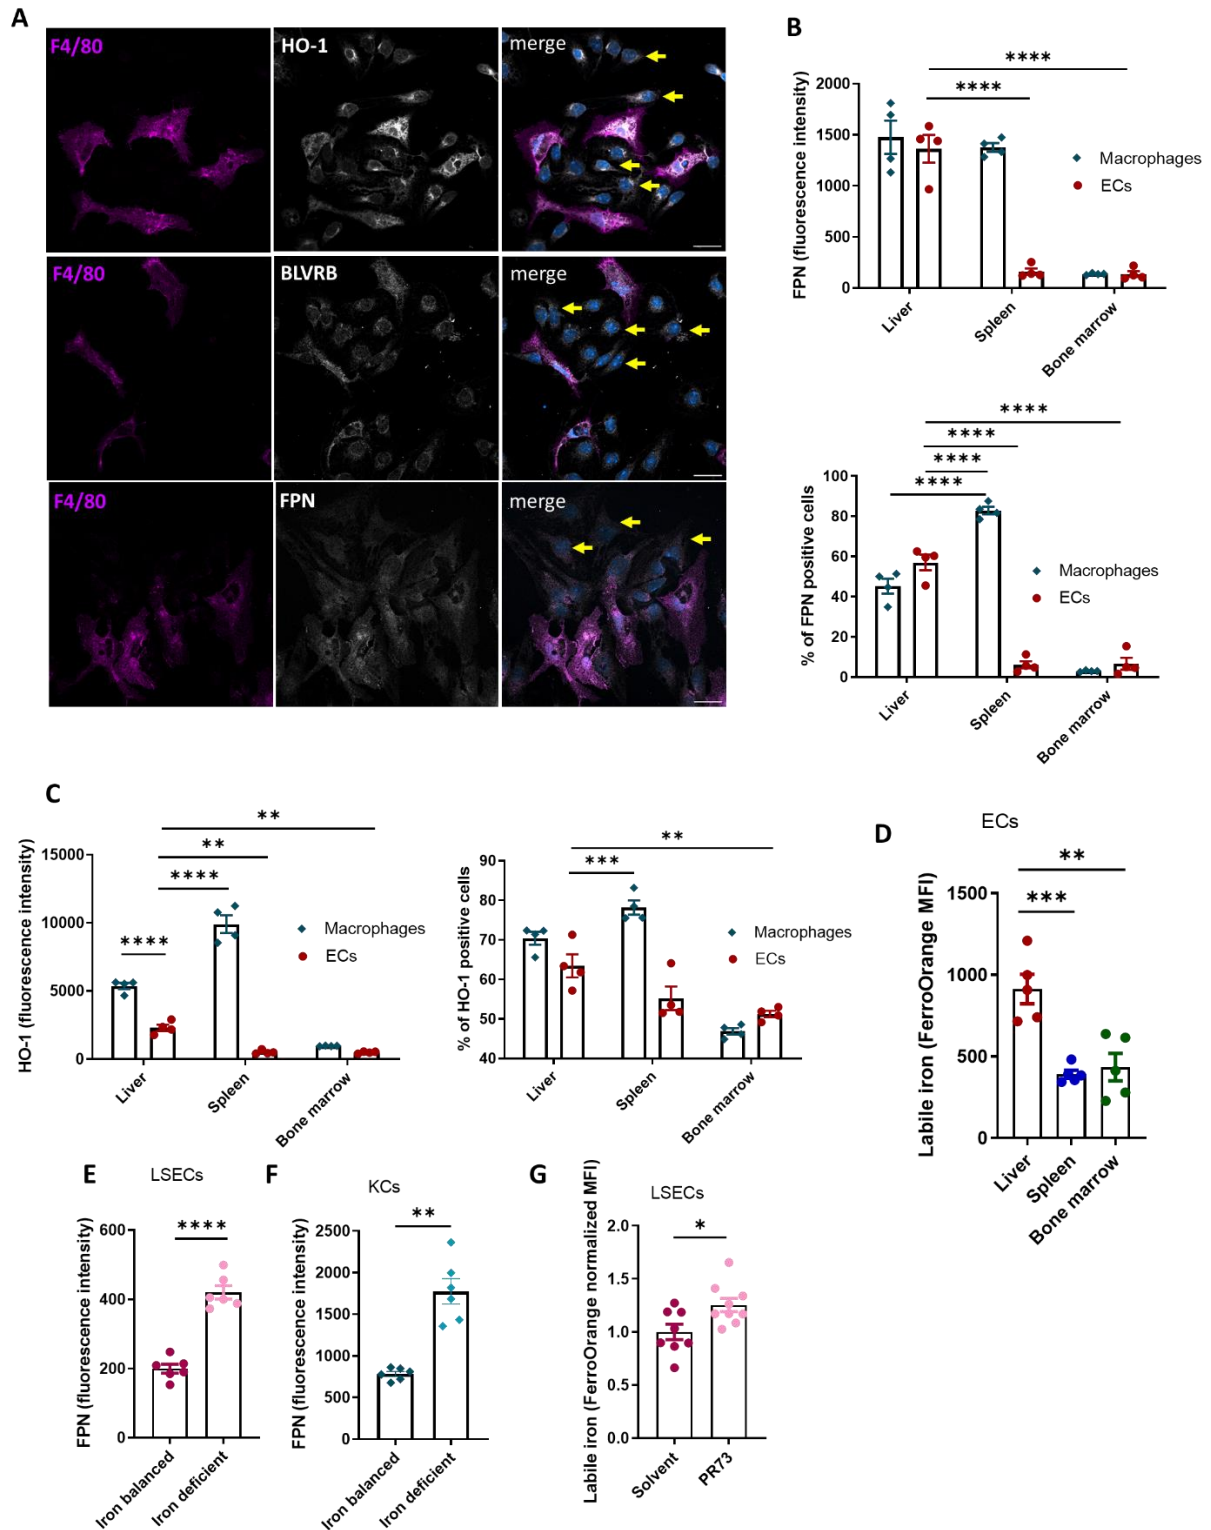

222

223 **Figure 3. LSECs constitutively express proteins critical for iron recycling.**

224 (A) HO-1, BLVRB, and FPN (white) presence in F4/80<sup>+</sup> (violet) KCs and F4/80<sup>-</sup> cells imaged by  
 225 microscopy in NPC *in vitro* cultures. Arrows indicate non-macrophage cells positive for the respective  
 226 proteins. Nuclei (blue), scale bars, 20  $\mu$ m. (B-C) Flow cytometry analysis of (B) FPN and (C) HO-1  
 227 expression in macrophages and endothelial cells (ECs). (D) Cytosolic ferrous iron (Fe<sup>2+</sup>) content in  
 228 endothelial cells was measured with a FerroOrange probe. (E-F) Flow cytometry analysis of FPN

229 expression of (E) LSEC and (F) KC populations isolated from mice kept on balanced or iron-deficient  
230 diets. (G) Cytosolic ferrous iron ( $\text{Fe}^{2+}$ ) content was measured with a FerroOrange probe in LSECs  
231 derived from mice injected with mini hepcidin (PR73). Microscopic images were acquired using a  
232 confocal microscope LSM 800 (Zeiss) equipped with an EC Plan-Neofluar 40x/1.30 Oil DIC M27 oil  
233 objective and T-PMT detectors. Acquisition software: ZEN 2.6. The images were processed using  
234 ImageJ software with linear gamma adjustments of contrast and brightness. Numerical data are  
235 expressed as mean  $\pm$ SEM and each data point represents one biological replicate. Welch's unpaired t-  
236 test was used to determine statistical significance in E, F and G; one-way ANOVA with Tukey's  
237 Multiple Comparison tests was used in D; while two-way ANOVA with Tukey's Multiple Comparison  
238 tests was used in B and C; ns - not significant, \* $p < 0.05$ , \*\* $p < 0.01$ , \*\*\* $p < 0.001$  and \*\*\*\* $p < 0.0001$ .  
239

#### 240 **LSECs and KCs support iron recycling by removing hemolysis products from the spleen**

241 We next sought to understand how LSECs might be involved in physiological iron recycling.  
242 The hemolysis-driven iron recycling model proposed by Klei et al. implied that RPMs likely  
243 sequester spleen-derived Hb via highly-expressed CD163.<sup>5</sup> However, CD163 knock-out mice  
244 do not show major differences in systemic and splenic iron parameters (Fig. S5). We  
245 hypothesized that hepatic cells may play a role in the clearance of splenic hemolytic products  
246 via portal circulation. We, therefore, extended previously reported studies by quantifying the  
247 contributions of splenic and hepatic myeloid and endothelial cells to the uptake of intact RBCs,  
248 RBCs devoid of cytoplasm (so-called RBC ghosts), and free Hb. To this end, we injected mice  
249 with temperature-stressed RBCs, derived from Ubi-GFP transgenic mice and stained with the  
250 membrane label PKH26 (Fig. 4A and B). This approach revealed that RPMs outperformed other  
251 splenic cell types, F4/80<sup>high</sup> CD11b<sup>high</sup> pre-RPMs, CD11c<sup>+</sup> dendritic cells (DCs), monocytes,  
252 and splenic ECs in the sequestration of PKH26<sup>+</sup>GFP<sup>+</sup> intact RBCs. An equal percentage of  
253 RPMs (approximately 30% of the population) were effective in removing PKH26<sup>+</sup>GFP<sup>-</sup> RBC  
254 ghosts, a function that was efficiently supported by splenic pre-RPMs, and to a lesser extent by  
255 DCs, monocytes, or ECs. Interestingly, we found that in the liver phagocytosis of intact RBCs  
256 by KCs was less efficient than the uptake of RBC ghosts (Fig. 4B). No erythrophagocytosis of  
257 intact RBCs was detected in hepatic DCs and LSECs, but they showed some capacity for the  
258 sequestration of RBC membranes, albeit lower than KCs. Injection of fluorescently-labeled  
259 RBC ghosts along with free Hb confirmed that KCs and LSECs, respectively, rather than RPMs  
260 or splenic ECs, are specialized in the clearance of these two major hemolysis products (Fig. 4C  
261 and D). Consistent with these data, we detected an increase in heme levels in the portal vein  
262 plasma, but not in the systemic circulation, after injection of stressed RBCs compared to control  
263 PBS-injected mice (Fig. 4E). We next sought to determine whether the activity of LSECs to  
264 sequester Hb could be modulated by the altered capacity of splenic RPMs to fully execute

265 erythrophagocytosis. First, we observed that LSECs became more effective at Hb uptake in  
266 response to macrophage depletion after clodronate injection (Fig. 4F). Second, we took  
267 advantage of the physiological difference in iron parameters between BALB/C and C57BL/6J  
268 (BL/6J) mice. We observed that the lower erythrophagocytic capacity of RPMs from BALB/C  
269 mice compared to BL/6J mice (Fig. 4G), which was associated with reduced RPM FPN  
270 expression (Fig. 4H), heme accumulation in the extracellular space of the spleen and portal  
271 plasma (Fig. 4I and J), was coupled with higher levels of labile iron and greater FPN expression  
272 in LSECs (Fig. 4K and L), indicating their higher activity in iron-recycling from Hb. Taken  
273 together, our findings support a physiological role for LSECs in the sequestration of  
274 endogenous spleen-derived Hb, thereby establishing a spleen-liver axis for effective iron  
275 recycling from senescent RBCs.

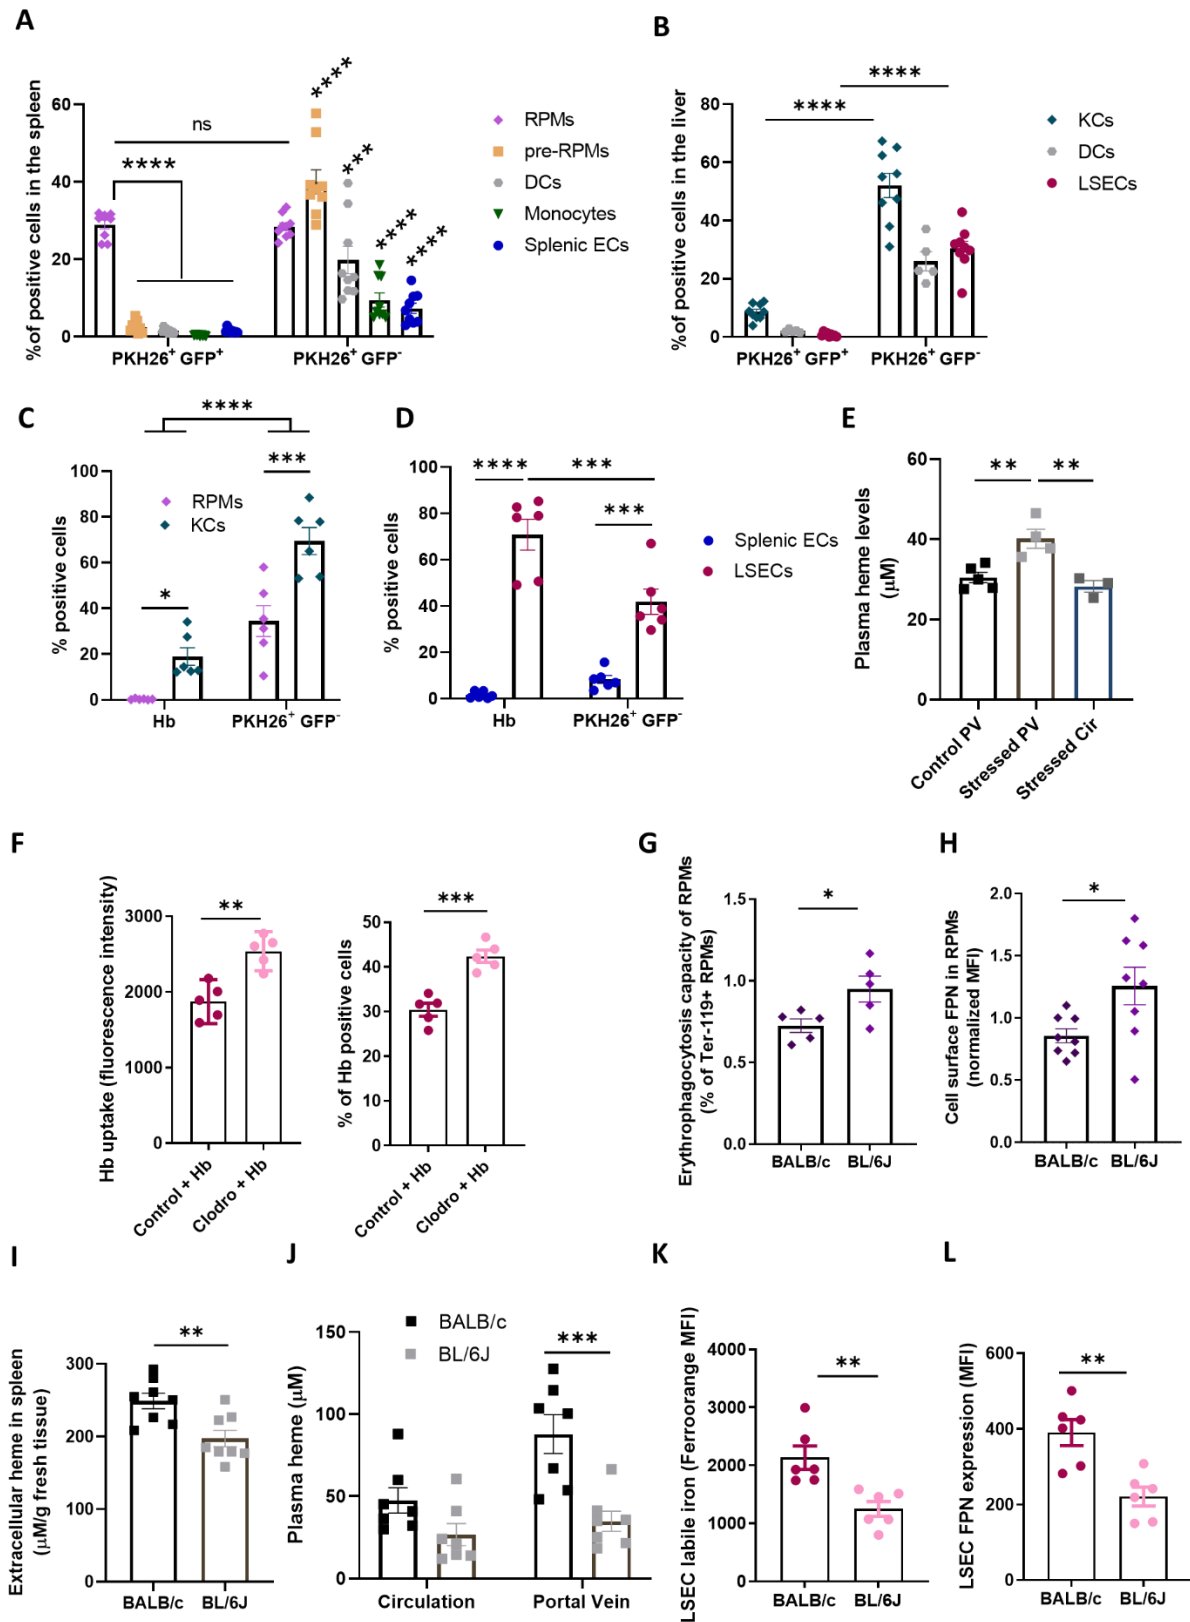

276

277 **Figure 4. LSECs and KCs support iron recycling by removing hemolysis products from the spleen.**

278 (A-D) Mice were administered i.v. with (A-B) stressed GFP<sup>+</sup> RBCs stained with a membrane marker  
 279 PKH26 or (C-D) Hb-AF750 and PKH26<sup>+</sup> RBCs devoid of cytoplasm (RBC ghosts). Splenic and liver  
 280 cells were isolated, stained, and analyzed by flow cytometry. (A) The percentage of cells positive for



281 markers of intact RBCs (PKH26<sup>+</sup>GFP<sup>+</sup>) and RBC ghosts (PKH26<sup>+</sup>GFP<sup>-</sup>) in splenic RPMs, pre-RPMs,  
282 dendritic cells (DCs), monocytes, and endothelial cells (ECs). (B) The percentage of PKH26<sup>+</sup>GFP<sup>+</sup> and  
283 PKH26<sup>+</sup>GFP<sup>-</sup> cells in liver KCs, dendritic cells (DCs), and LSECs. (C-D) The percentage of cells  
284 positive for Hb (AF750) and RBC ghosts. (E) Heme levels from the portal vein (PV) or circulation (Cir)  
285 plasma of control and mice transfused with temperature-stressed RBCs (sRBCs), measured by Heme  
286 Assay Kit. (F) Hb-AF750 uptake by LSECs derived from control and macrophage-depleted mice  
287 (Clodro). (G-L) BALB/c and C57BL/6J (BL/BJ) mice phenotype comparison. (G) The capacity of  
288 endogenous erythrophagocytosis assessed by intracellular staining of the erythrocytic marker (Ter-119)  
289 in RPMs. (H) FPN surface levels in RPMs measured by flow cytometry. (I) Extracellular heme content  
290 in the spleen and (J) heme levels in the portal vein and circulation plasma were measured with Heme  
291 Assay Kit. (K) Cytosolic ferrous iron (Fe<sup>2+</sup>) levels in LSECs were measured with a FerroOrange probe.  
292 (L) FPN levels in LSECs measured by flow cytometry. Data are expressed as mean ± SEM and each  
293 data point represents one biological replicate. Welch's unpaired t-test was used to determine statistical  
294 significance in F-I and K-L one-way ANOVA with Tukey's Multiple Comparison tests was used in E;  
295 while two-way ANOVA with Tukey's Multiple Comparison tests was used in A-D and J; ns - not  
296 significant, \*p<0.05, \*\*p<0.01, \*\*\*p<0.001 and \*\*\*\*p<0.0001.

### 297 **LSECs detoxify hemoglobin upon hemolysis and trigger the iron-sensing BMP6 angiokine**

298 We next set out to investigate the response of LSECs to hemolytic conditions. To this end, we  
299 first injected mice with 10 mg of mouse hemoglobin (equivalent to the RBC fraction in  
300 approximately 100 µl of blood) in a time-course manner. We observed a transient increase in  
301 iron levels in the liver, but not in the spleen, which was normalized by the 24-hour endpoint  
302 (Fig. 5A and S6A). Notably, the kidney also accumulated iron that could not be mobilized and  
303 remained elevated throughout the experiment (Fig. S6B). Hemoglobin clearance in the liver  
304 resulted in a strong transcriptional induction of the heme catabolizing enzyme *Hmox1*, a  
305 response that could be attributed specifically to LSECs (Fig. 5B and C). It also significantly  
306 increased the number of LSECs expressing FPN on the cell surface (Fig. 5D). Hemoglobin  
307 challenge rapidly increased the expression of the iron-sensing gene *Bmp6* in FACS-sorted  
308 LSECs, accompanied by the upregulation of the BMP target gene hepcidin (*Hamp*) in the liver,  
309 (Fig. 5E-G). As expected, induction of the BMP6-hepcidin axis caused serum hypoferrremia at  
310 the 15 h time point which also normalized after 24 h (Fig. 5H), reflecting the changes in liver  
311 iron content (Fig. 5A). The rapid induction of *Hmox1* in LSECs upon intravenous Hb delivery  
312 was phenocopied by injecting the mice with the hemolytic agent phenylhydrazine (PHZ) and  
313 exceeded by far the response of KCs, splenic cells and aorta (Fig. 5I and J). PHZ also caused a  
314 significant, albeit mild, iron accumulation in the liver (Fig. 5K), but not in other organs (Fig.  
315 S6C and D), and activation of *Bmp6* transcription (Fig. 5L).

316 Finally, we aimed to determine whether LSECs induce a specific response when exposed to Hb  
317 compared to non-heme iron. To this end, we performed RNA sequencing to assess global gene  
318 expression signatures upon injection of 10 mg of Hb and a quantitatively adjusted dose of iron

319 citrate. Although both stimuli elicited a very similar induction of *Bmp6*, they elicited different  
320 responses of LSECs at the transcriptome-wide level (Fig. 5M). While only 64 genes, mainly  
321 attributable to the response to oxidative stress and iron were co-induced by Hb and iron citrate  
322 (Fig. 5M), as many as 372 and 202 genes up-regulated their expression specifically upon Hb  
323 and iron citrate injection, respectively. These differences were reflected by a largely distinct  
324 functional enrichment within the Hb- and iron-induced transcriptional signature (Fig. 5N).  
325 Interestingly, Hb-exposed LSECs specifically induced genes associated with immune and  
326 inflammatory responses, such as the phagocyte marker *Cd68*, the chemokines *Ccl24*, *Ccl6*, and  
327 *Ccl9*, and importantly, *Il18*, a cytokine implicated in the pathogenesis of the hemolytic sickle  
328 cell disease.<sup>34</sup> Furthermore, Hb ingestion activated gene expression signatures associated with  
329 phagocytosis, the PI3K-Akt pathway, growth factor activity, and intracellular signaling,  
330 enriched categories with several links to actin remodeling and, in some cases, directly to  
331 macropinocytosis. Indeed, several genes induced by Hb, such as the receptors *Axl*, *Csf1r*, and  
332 *Met*, the growth factors *Hgf* and *Pdgfa*, or the actin cytoskeleton-interacting factors *Evl* and  
333 *Coro1a* are known to play a role in the regulation and/or execution of macropinocytosis.<sup>27,35-37</sup>  
334 Collectively, these findings support the role of LSECs in Hb clearance and demonstrate their  
335 high capacity to trigger the iron-sensing *Bmp6* angiokine in response to excessive Hb, along  
336 with specific pro-inflammatory markers and factors associated with actin remodeling.

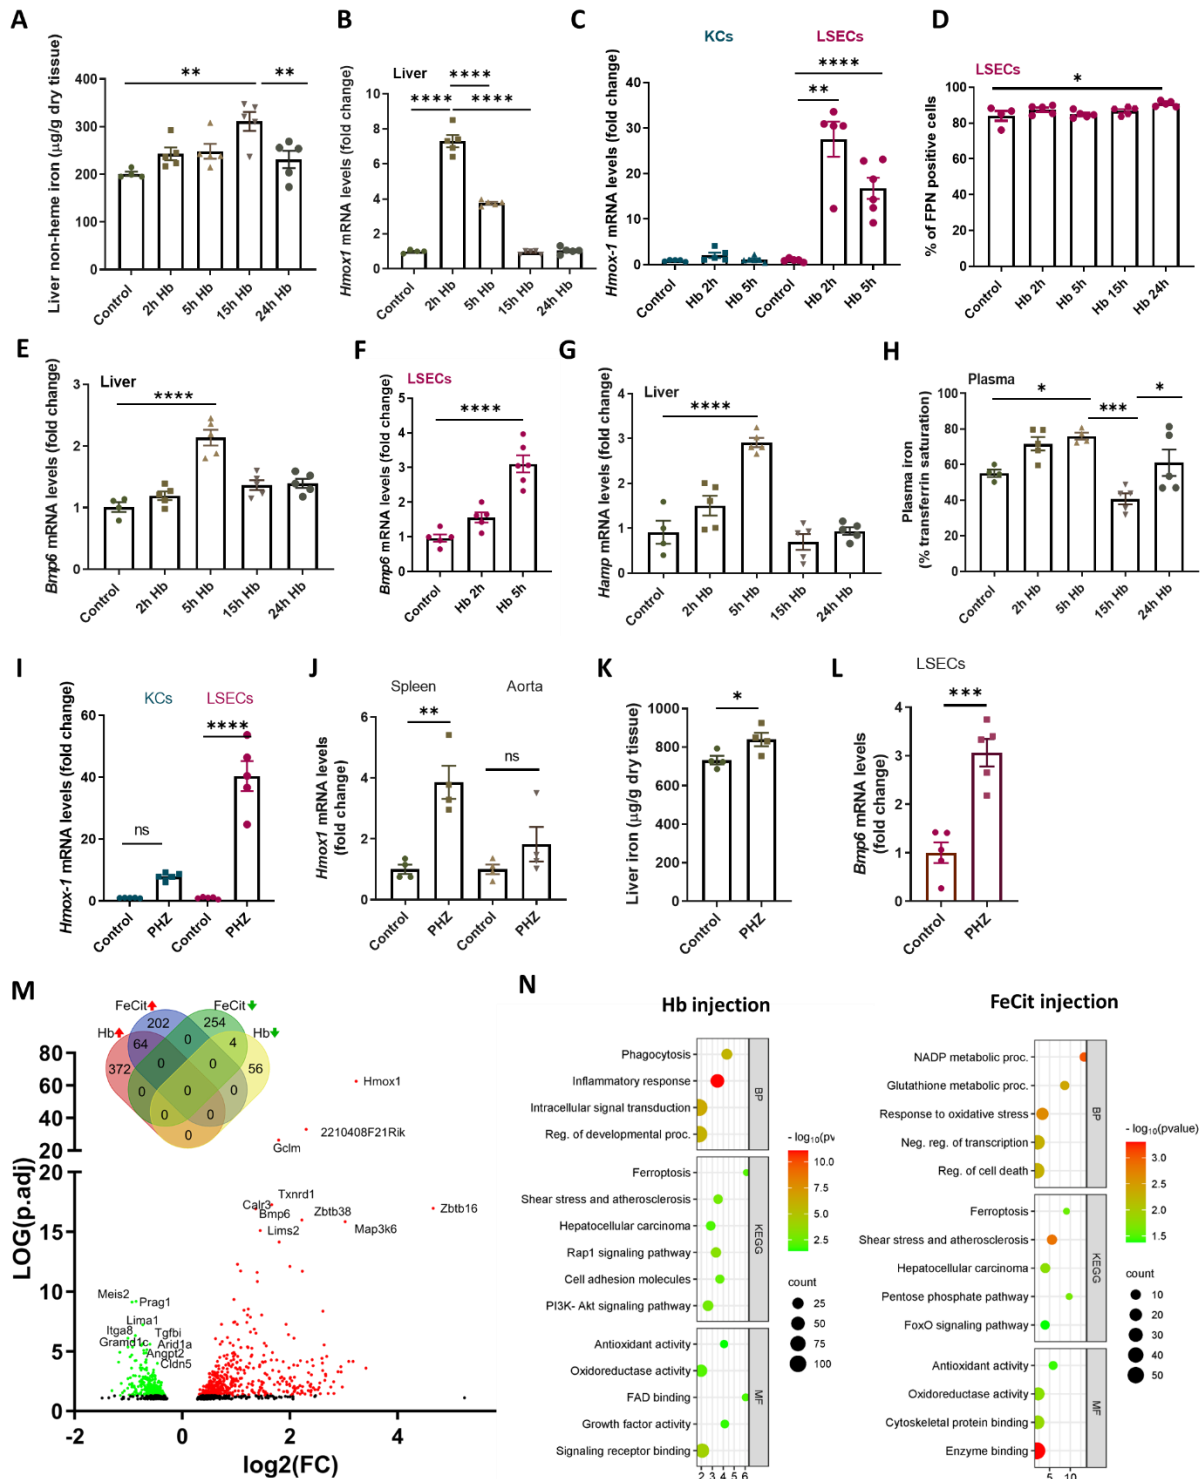

337

338 **Figure 5. LSECs detoxify hemoglobin upon hemolysis and trigger the iron-sensing BMP6**  
 339 **angiokine.**

340 (A-G) Mice were injected with native hemoglobin (Hb, 10 mg/mouse) and analyzed at indicated time  
 341 points. (A) Non-heme iron content in the liver was measured by bathophenanthroline colorimetric assay.  
 342 (B and C) *Hmox1* gene expression measurement by RT-PCR in (B) the liver and (C) FACS-sorted KC  
 343 and LSEC populations. (D) FPN levels in LSECs were measured with flow cytometry. (E, F) *Bmp6* and  
 344 (G) *Hamp* gene expression measured by RT-qPCR in whole livers or sorted LSECs, as indicated. (H)

345 Plasma iron levels were determined by transferrin saturation measurements. (I-L) Hemolysis was  
346 induced in mice by i.p. injection of phenylhydrazine (PHZ, 0.125 mg/g) 6 h before analysis. *Hmx1*  
347 gene expression in (I) FACS-sorted cell populations of KCs and LSECs, and (J) spleen and aorta. (K)  
348 Non-heme iron content in the liver. (L) *Bmp6* expression in FACS-sorted LSECs. Data are expressed as  
349 mean  $\pm$  SEM and each data point represents one biological replicate. (M-N) Mice were injected with Hb  
350 (10 mg) or Ferric citrate (FeCit, 150  $\mu$ g) for 5 h. (M) A volcano plot of differentially regulated genes  
351 identified by the RNASeq transcriptomic analysis in FACS-sorted LSECs. The green color indicates  
352 negatively, and the red color positively regulated genes. Venn diagram shows genes regulated by Hb  
353 and FeCit. (N) functional enrichment among genes induced by Hb or FeCit. The x-axis represents the  
354 fold of enrichment. The y-axis represents GO terms of biological processes (BP), Kyoto Encyclopedia  
355 of Genes and Genomes terms (KEGG), and GO terms of molecular function (MF). The size of the dot  
356 represents the number of genes under a specific term. The color of the dots represents the adjusted P-  
357 value. Welch's unpaired t-test was used to determine statistical significance in K-L, one-way ANOVA  
358 with Tukey's Multiple Comparison tests was used in A-B and, D-H; while two-way ANOVA with  
359 Tukey's Multiple Comparison tests was used in C, I and J; ns - not significant, \* $p < 0.05$ , \*\* $p < 0.01$ ,  
360 \*\*\* $p < 0.001$  and \*\*\*\* $p < 0.0001$ .

## 361 Discussion

362 Recent advances have revealed the critical role of the specialized hepatic sinusoidal  
363 endothelium in maintaining systemic and liver homeostasis. The scavenging activity of LSECs  
364 is essential for the hepatic clearance of biological macromolecules, such as denatured collagen,  
365 glycans/glycation end products, modified low-density lipoproteins, small immune complexes,  
366 lipopolysaccharides or viruses.<sup>20,21,38-40</sup> In addition, LSECs regulate the vascular tone in the  
367 liver, balance the tolerogenic immune milieu with the onset of immune responses, ensure  
368 physiological zonation of hepatic immune cells,<sup>40,41</sup> and control iron balance by producing the  
369 angiokines BMP2 and BMP6.<sup>22,23</sup> Our study identifies the novel homeostatic role of LSECs in  
370 the clearance of free Hb, an activity that converges with their scavenging and iron-regulatory  
371 functions.

372 The clearance functions of LSECs have been attributed to their extraordinary endocytic activity  
373 and the surface expression of scavenger receptors.<sup>20</sup> We discovered that LSECs have a  
374 remarkable and constitutive capacity for macropinocytosis, similar to that of macrophages,  
375 which use this pathway for antigen presentation, and in contrast to the inducible  
376 macropinocytosis of cancer cells, which is critical for nutrient acquisition.<sup>26,28</sup> We show that  
377 this capability distinguishes LSECs from ECs of other organs, thus significantly expanding the  
378 scarce knowledge on the macropinocytic activity of ECs<sup>42</sup> and assigning physiological  
379 significance to early observations that LSECs can engage macropinocytosis for antigen  
380 capture.<sup>43</sup> We propose that macropinocytosis of LSECs likely contributes to their scavenging  
381 function. While this possibility merits future studies, macropinocytosis has recently been

382 identified as a major driver of LDL uptake by macrophages, leading to foam cell formation in  
383 atherosclerosis.<sup>44</sup> Hence, our findings aid in shifting the paradigm from the sole role of  
384 scavenger receptor-mediated endocytosis in the clearance of blood-borne macromolecules,  
385 emphasizing the importance of macropinocytic uptake. Further studies would be required to  
386 address mechanistic details of how  $\beta$ -catenin signaling supports macropinocytosis of LSECs  
387 and whether its pharmacological blockade would impair liver clearance functions.

388 Our study employed *in vivo* approaches to verify the role of macrophages in Hb uptake and  
389 revealed that LSECs qualitatively and quantitatively outcompete CD163-expressing KCs and  
390 RPMs in this task. These provocative findings may be explained by the fact that the role of  
391 CD163 in Hb uptake has been mainly investigated by its ectopic expression in non-macrophage  
392 cells and by using polyclonal blocking anti-CD163 in cultured macrophages.<sup>9,11,45</sup> Our study  
393 does not exclude the contribution of iron-recycling macrophages to Hb uptake in hemolytic  
394 conditions, nor does it imply that other tissues/endothelial cells are unaffected by prolonged  
395 and pathological exposure to free Hb and heme.<sup>46</sup> It remains to be determined to what extent  
396 LSEC-mediated Hb uptake protects other organs in hemolytic disorders, such as sickle cell  
397 disease or thalassemia, and whether and how LSEC functions are impaired in such conditions.  
398 Noteworthy, CD163-expressing macrophages play important anti-inflammatory roles, for  
399 example in the tumor microenvironment or arthritis, but these tissue-specific roles do not appear  
400 to be related to Hb clearance.<sup>47-49</sup> Finally, even though the clearance of free circulating Hb was  
401 much faster than that of Hb-haptoglobin complexes in dogs,<sup>10</sup> consistent with our model, the  
402 CD163-independent uptake of Hb by LSECs would need to be verified in human cells.

403 Most importantly, our study defines and quantifies the individual contribution of splenic and  
404 hepatic cell types to physiological iron recycling. Consistent with previous studies,<sup>3,4</sup> we  
405 provide evidence that RPMs are efficient at phagocytosis of intact stressed RBCs, whereas the  
406 liver is the site of scavenging steady-state hemolytic products. KCs are efficient in the uptake  
407 of RBC ghosts and outperform RPMs in the Hb uptake. LSECs, due to their anatomical location,  
408 exceptional macropinocytic activity, and expression of the iron-recycling proteins, emerge as a  
409 novel cell type involved in the maintenance of iron homeostasis, specialized for the removal of  
410 spleen-derived Hb. Consistent with this newly proposed role of LSECs, it has been reported  
411 that endothelial-specific FPN knock-out mice exhibit marked iron deficiency, develop anemia,  
412 and show iron loading in liver NPC.<sup>50</sup> Further studies using cell-type specific genetic deletions  
413 of proteins involved in iron recycling would be crucial to quantify the exact contribution of

414 RPMs, KCs, and LSECs to the circulating plasma iron pool and thus assess their relative  
415 involvement in iron recycling from RBCs.

## 416 **Methods**

### 417 **Mice and *in vivo* procedures**

418  
419 Female BALB/c mice (8-10 weeks old) were obtained from the Experimental Medicine Centre  
420 of the Medical University of Bialystok or the Mossakowski Medical Research Institute of the  
421 Polish Academy of Sciences. Female C57BL/6-Tg(UBC-GFP)30Scha/J (UBI-GFP/BL6) mice  
422 were kindly provided by Aneta Suwińska (Faculty of Biology, University of Warsaw, Poland).  
423 Female and male (8-12 weeks old) WT C57BL/6J and *Cd163*<sup>-/-</sup> mice were kindly provided by  
424 Anders Etzerodt (Department of Biomedicine, Aarhus University, Denmark). For the dietary  
425 experiment, C57BL/6J females (4 weeks old) were obtained from the Experimental Medicine  
426 Centre of the Medical University of Bialystok. Mice were fed with a standard iron diet of 200  
427 mg/kg (control) or a low iron diet containing <6 mg/kg (iron deficient) for 5 weeks before  
428 analysis. All mice were maintained at the SPF facility under standard conditions (20°C,  
429 humidity 60%, 12-h light/dark cycle). All animal experiments were conducted following the  
430 guidelines of European Directive 2010/63/EU and the Federation for Laboratory Animal  
431 Science Associations. The procedures were approved by the local ethical committee in Warsaw  
432 (No. WAW2/150/2019, WAW2/138/2019, WAW2/137/2020, WAW2/137/2021,  
433 WAW2/179/2021, and WAW2/094/2021), or for the dietary experiment by the local ethical  
434 committee in Olsztyn No. 26/2018.

435 Proteins or their conjugates were dissolved in PBS and administered intravenously (*i.v.*) at the  
436 dose indicated in the particular figure legend. For macrophage depletion, mice received  
437 *i.v.* solution of liposomes containing clodronic acid (LIPOSOMA, #C-SUV-005) (5 ml/kg) or  
438 control empty liposomes for 24 h. A sterile aqueous iron citrate (FeCit, 150 µg/mouse) solution  
439 (Sigma-Aldrich-Aldrich, #F3388) or sterile citric acid buffer (0.05 M, Sigma-Aldrich,  
440 #251275) were normalized to pH 7.0 and administered *i.v.* for 5 h. Mini-hepcidin (PR73, 50  
441 nmol/mouse) (kind gift from Elizabeta Nemeth, UCLA, USA) was injected intraperitoneally  
442 (*i.p.*) for 4 h. To induce hemolysis, a sterile solution of phenylhydrazine (PHZ) (Sigma-Aldrich,  
443 #P26252) in PBS was administered *i.p.* at a dose of 0.125 mg/g of body weight for 6 h. PKH26-  
444 stained (Sigma Aldrich, #PKH26GL-1KT) temperature-stressed UBI-GFP RBCs were  
445 resuspended to 50% hematocrit in HBSS (Capricorn, #HBSS-1A) and administered *i.v.* for



446 1.5 h. PKH26-stained RBCs ghosts were mixed with fluorescently labeled Hb (10 µg/mouse)  
447 and administered *i.v.* for 1.5 h.

#### 448 **Cell-based and biochemical assays**

449 Isolation of non-parenchymal liver cells (NPCs) for primary cell cultures together with cell  
450 treatments and immunofluorescence are described in the Supplementary Methods. Isolation of  
451 cells from the spleen, bone marrow, and aorta, flow cytometry, FACS-sorting, liver tissue  
452 immunofluorescence, heme/iron measurements, preparation of conjugated mouse Hb, stressed  
453 RBCs, and RBC ghosts, and real-time quantitative PCR (RT-qPCR) were performed as  
454 previously reported,<sup>25</sup> or/and described in detail in Supplementary Methods.

#### 455 **RNA sequencing**

456 Transcriptome analysis of LSECs was conducted using the AmpliSeq method as described in  
457 the Supplementary Methods. Data for iron citrate injection were deposited previously in the  
458 GEO repository under accession no GSE235976 (secured with a token: ubcbegoyrxglfeb to  
459 allow review), whereas for Hb injection under no GSE240270 (with a token:  
460 uhkrgywyhledjmj).

#### 461 **Acknowledgments**

462 This work was funded by the National Science Centre grant 2018/31/B/NZ4/03676 to KMS  
463 and the Foundation of Polish Science grant TEAM TECH/2016-1/8 to TPR. We express  
464 gratitude to Marta Niklewicz for her substantial technical assistance in this project. We would  
465 like to thank Daria Zdżalik-Bielecka for her valuable advice during the initial phases of the  
466 project, and to Rafał Mazgaj for providing technical assistance in conducting experiments with  
467 confocal microscopy. Additionally, we extend our thanks to Damian Strzemecki for his  
468 technical assistance in performing mice injections. We thank Tara Arvedson (Amgen Inc. USA)  
469 for the anti-ferroportin antibody, Elizabeta Nemeth for PR73, and Aneta Suwińska for sharing  
470 UBI-GFP/BL6 mice. Many thanks to Agnieszka Popielska and Anna Kosson, and the staff of  
471 the Experimental Medicine Centre (Białystok, Poland) and Mossakowski Medical Research  
472 Institute (Warsaw, Poland) for their technical support.

473

#### 474 **Authorship Contributions**

475 KMS, GZ, TPR, ZS, and MMio conceived and planned the experiments; ZS, GZ, AJ, PS, RM,  
476 MC, IR, KJ, and MMo performed research; GZ, ZS, AJ, PS, RM, MC, MK, analyzed data; GZ,  
477 ZS, AJ, PS, RM, MC, KJ, KMS, MMik, visualized data; MMik curated RNA-Seq data; KMS,

478 TPR supervised the study; TPR, AJ, MMio and AE edited the manuscript; KMS, GZ, and ZS  
479 wrote the manuscript.

#### 480 **Conflict of Interest Disclosure**

481 The authors declare that they have no conflict of interest.

#### 482 **References**

- 483 1. Slusarczyk P, Mleczko-Sanecka K. The Multiple Facets of Iron Recycling. *Genes*  
484 (*Basel*). 2021;12(9).
- 485 2. Muckenthaler MU, Rivella S, Hentze MW, Galy B. A Red Carpet for Iron Metabolism.  
486 *Cell*. 2017;168(3):344-361.
- 487 3. Youssef LA, Rebbaa A, Pampou S, et al. Increased erythrophagocytosis induces  
488 ferroptosis in red pulp macrophages in a mouse model of transfusion. *Blood*.  
489 2018;131(23):2581-2593.
- 490 4. Ma S, Dubin AE, Zhang Y, et al. A role of PIEZO1 in iron metabolism in mice and  
491 humans. *Cell*. 2021;184(4):969-982 e913.
- 492 5. Klei TRL, Dalimot J, Nota B, et al. Hemolysis in the spleen drives erythrocyte turnover.  
493 *Blood*. 2020;136(14):1579-1589.
- 494 6. Kato GJ, Steinberg MH, Gladwin MT. Intravascular hemolysis and the pathophysiology  
495 of sickle cell disease. *J Clin Invest*. 2017;127(3):750-760.
- 496 7. Schaer DJ, Vinchi F, Ingoglia G, Tolosano E, Buehler PW. Haptoglobin, hemopexin,  
497 and related defense pathways-basic science, clinical perspectives, and drug  
498 development. *Front Physiol*. 2014;5:415.
- 499 8. Wang Y, Kinzie E, Berger FG, Lim SK, Baumann H. Haptoglobin, an inflammation-  
500 inducible plasma protein. *Redox Rep*. 2001;6(6):379-385.
- 501 9. Kristiansen M, Graversen JH, Jacobsen C, et al. Identification of the haemoglobin  
502 scavenger receptor. *Nature*. 2001;409(6817):198-201.
- 503 10. Boretti FS, Baek JH, Palmer AF, Schaer DJ, Buehler PW. Modeling hemoglobin and  
504 hemoglobin:haptoglobin complex clearance in a non-rodent species-pharmacokinetic  
505 and therapeutic implications. *Front Physiol*. 2014;5:385.
- 506 11. Schaer DJ, Schaer CA, Buehler PW, et al. CD163 is the macrophage scavenger receptor  
507 for native and chemically modified hemoglobins in the absence of haptoglobin. *Blood*.  
508 2006;107(1):373-380.

- 509 12. Etzerodt A, Kjolby M, Nielsen MJ, Maniecki M, Svendsen P, Moestrup SK. Plasma  
510 clearance of hemoglobin and haptoglobin in mice and effect of CD163 gene targeting  
511 disruption. *Antioxid Redox Signal*. 2013;18(17):2254-2263.
- 512 13. Theurl I, Hilgendorf I, Nairz M, et al. On-demand erythrocyte disposal and iron  
513 recycling requires transient macrophages in the liver. *Nat Med*. 2016;22(8):945-951.
- 514 14. Vinchi F, De Franceschi L, Ghigo A, et al. Hemopexin therapy improves cardiovascular  
515 function by preventing heme-induced endothelial toxicity in mouse models of hemolytic  
516 diseases. *Circulation*. 2013;127(12):1317-1329.
- 517 15. Vinchi F, Sparla R, Passos ST, et al. Vasculo-toxic and pro-inflammatory action of  
518 unbound haemoglobin, haem and iron in transfusion-dependent patients with  
519 haemolytic anaemias. *Br J Haematol*. 2021;193(3):637-658.
- 520 16. Fagoonee S, Gburek J, Hirsch E, et al. Plasma protein haptoglobin modulates renal iron  
521 loading. *Am J Pathol*. 2005;166(4):973-983.
- 522 17. Marro S, Barisani D, Chiabrando D, et al. Lack of haptoglobin affects iron transport  
523 across duodenum by modulating ferroportin expression. *Gastroenterology*.  
524 2007;133(4):1261-1271.
- 525 18. Poisson J, Lemoine S, Boulanger C, et al. Liver sinusoidal endothelial cells:  
526 Physiology and role in liver diseases. *Journal of hepatology*. 2017;66(1):212-227.
- 527 19. Sorensen KK, McCourt P, Berg T, et al. The scavenger endothelial cell: a new player in  
528 homeostasis and immunity. *American journal of physiology Regulatory, integrative and*  
529 *comparative physiology*. 2012;303(12):R1217-1230.
- 530 20. Koch PS, Lee KH, Goerdts S, Augustin HG. Angiodiversity and organotypic functions  
531 of sinusoidal endothelial cells. *Angiogenesis*. 2021;24(2):289-310.
- 532 21. Schledzewski K, Geraud C, Arnold B, et al. Deficiency of liver sinusoidal scavenger  
533 receptors stabilin-1 and -2 in mice causes glomerulofibrotic nephropathy via impaired  
534 hepatic clearance of noxious blood factors. *J Clin Invest*. 2011;121(2):703-714.
- 535 22. Koch PS, Olsavszky V, Ulbrich F, et al. Angiocrine Bmp2 signaling in murine liver  
536 controls normal iron homeostasis. *Blood*. 2017;129(4):415-419.
- 537 23. Canali S, Zumbrennen-Bullough KB, Core AB, et al. Endothelial cells produce bone  
538 morphogenetic protein 6 required for iron homeostasis in mice. *Blood*.  
539 2017;129(4):405-414.
- 540 24. Mleczko-Sanecka K, Silvestri L. Cell-type-specific insights into iron regulatory  
541 processes. *Am J Hematol*. 2021;96(1):110-127.

- 542 25. Slusarczyk P, Mandal PK, Zurawska G, et al. Impaired iron recycling from erythrocytes  
543 is an early hallmark of aging. *Elife*. 2023;12.
- 544 26. Canton J. Macropinocytosis: New Insights Into Its Underappreciated Role in Innate  
545 Immune Cell Surveillance. *Front Immunol*. 2018;9:2286.
- 546 27. Zdzalik-Bielecka D, Poswiata A, Kozik K, et al. The GAS6-AXL signaling pathway  
547 triggers actin remodeling that drives membrane ruffling, macropinocytosis, and cancer-  
548 cell invasion. *Proc Natl Acad Sci U S A*. 2021;118(28).
- 549 28. Commisso C, Davidson SM, Soydaner-Azeloglu RG, et al. Macropinocytosis of protein  
550 is an amino acid supply route in Ras-transformed cells. *Nature*. 2013;497(7451):633-  
551 637.
- 552 29. Klein D, Demory A, Peyre F, et al. Wnt2 acts as a cell type-specific, autocrine growth  
553 factor in rat hepatic sinusoidal endothelial cells cross-stimulating the VEGF pathway.  
554 *Hepatology*. 2008;47(3):1018-1031.
- 555 30. Tejada-Munoz N, Albrecht LV, Bui MH, De Robertis EM. Wnt canonical pathway  
556 activates macropinocytosis and lysosomal degradation of extracellular proteins. *Proc*  
557 *Natl Acad Sci U S A*. 2019;116(21):10402-10411.
- 558 31. Redelman-Sidi G, Binyamin A, Gaeta I, et al. The Canonical Wnt Pathway Drives  
559 Macropinocytosis in Cancer. *Cancer Res*. 2018;78(16):4658-4670.
- 560 32. Kalucka J, de Rooij L, Goveia J, et al. Single-Cell Transcriptome Atlas of Murine  
561 Endothelial Cells. *Cell*. 2020;180(4):764-779 e720.
- 562 33. Stefanova D, Raychev A, Deville J, et al. Hepcidin Protects against Lethal Escherichia  
563 coli Sepsis in Mice Inoculated with Isolates from Septic Patients. *Infect Immun*.  
564 2018;86(7).
- 565 34. Gupta A, Fei YD, Kim TY, et al. IL-18 mediates sickle cell cardiomyopathy and  
566 ventricular arrhythmias. *Blood*. 2021;137(9):1208-1218.
- 567 35. BoseDasgupta S, Moes S, Jenoe P, Pieters J. Cytokine-induced macropinocytosis in  
568 macrophages is regulated by 14-3-3zeta through its interaction with serine-  
569 phosphorylated coronin 1. *FEBS J*. 2015;282(7):1167-1181.
- 570 36. Visweshwaran SP, Nayab H, Hoffmann L, et al. Ena/VASP proteins at the crossroads  
571 of actin nucleation pathways in dendritic cell migration. *Front Cell Dev Biol*.  
572 2022;10:1008898.
- 573 37. Recouvreux MV, Commisso C. Macropinocytosis: A Metabolic Adaptation to Nutrient  
574 Stress in Cancer. *Front Endocrinol (Lausanne)*. 2017;8:261.

- 575 38. Ganesan LP, Kim J, Wu Y, et al. FcγRIIb on liver sinusoidal endothelium clears  
576 small immune complexes. *J Immunol.* 2012;189(10):4981-4988.
- 577 39. Malovic I, Sorensen KK, Elvevold KH, et al. The mannose receptor on murine liver  
578 sinusoidal endothelial cells is the main denatured collagen clearance receptor.  
579 *Hepatology.* 2007;45(6):1454-1461.
- 580 40. Shetty S, Lalor PF, Adams DH. Liver sinusoidal endothelial cells - gatekeepers of  
581 hepatic immunity. *Nat Rev Gastroenterol Hepatol.* 2018;15(9):555-567.
- 582 41. Gola A, Dorrington MG, Speranza E, et al. Commensal-driven immune zonation of the  
583 liver promotes host defence. *Nature.* 2021;589(7840):131-136.
- 584 42. Lin XP, Mintern JD, Gleeson PA. Macropinocytosis in Different Cell Types:  
585 Similarities and Differences. *Membranes (Basel).* 2020;10(8).
- 586 43. Connolly MK, Bedrosian AS, Malhotra A, et al. In hepatic fibrosis, liver sinusoidal  
587 endothelial cells acquire enhanced immunogenicity. *J Immunol.* 2010;185(4):2200-  
588 2208.
- 589 44. Lin HP, Singla B, Ahn W, et al. Receptor-independent fluid-phase macropinocytosis  
590 promotes arterial foam cell formation and atherosclerosis. *Sci Transl Med.*  
591 2022;14(663):eadd2376.
- 592 45. Schaer CA, Schoedon G, Imhof A, Kurrer MO, Schaer DJ. Constitutive endocytosis of  
593 CD163 mediates hemoglobin-heme uptake and determines the noninflammatory and  
594 protective transcriptional response of macrophages to hemoglobin. *Circ Res.*  
595 2006;99(9):943-950.
- 596 46. Buehler PW, Humar R, Schaer DJ. Haptoglobin Therapeutics and  
597 Compartmentalization of Cell-Free Hemoglobin Toxicity. *Trends Mol Med.*  
598 2020;26(7):683-697.
- 599 47. Etzerodt A, Tsalkitzi K, Maniecki M, et al. Specific targeting of CD163(+) TAMs  
600 mobilizes inflammatory monocytes and promotes T cell-mediated tumor regression. *J*  
601 *Exp Med.* 2019;216(10):2394-2411.
- 602 48. Etzerodt A, Moulin M, Doktor TK, et al. Tissue-resident macrophages in omentum  
603 promote metastatic spread of ovarian cancer. *J Exp Med.* 2020;217(4).
- 604 49. Svendsen P, Etzerodt A, Deleuran BW, Moestrup SK. Mouse CD163 deficiency  
605 strongly enhances experimental collagen-induced arthritis. *Sci Rep.* 2020;10(1):12447.
- 606 50. Zhang Z, Guo X, Herrera C, et al. Bmp6 expression can be regulated independently of  
607 liver iron in mice. *PLoS One.* 2014;9(1):e84906.
